# Supplementary material
Source: PubMed Central journal article supplement (PMC1913879)

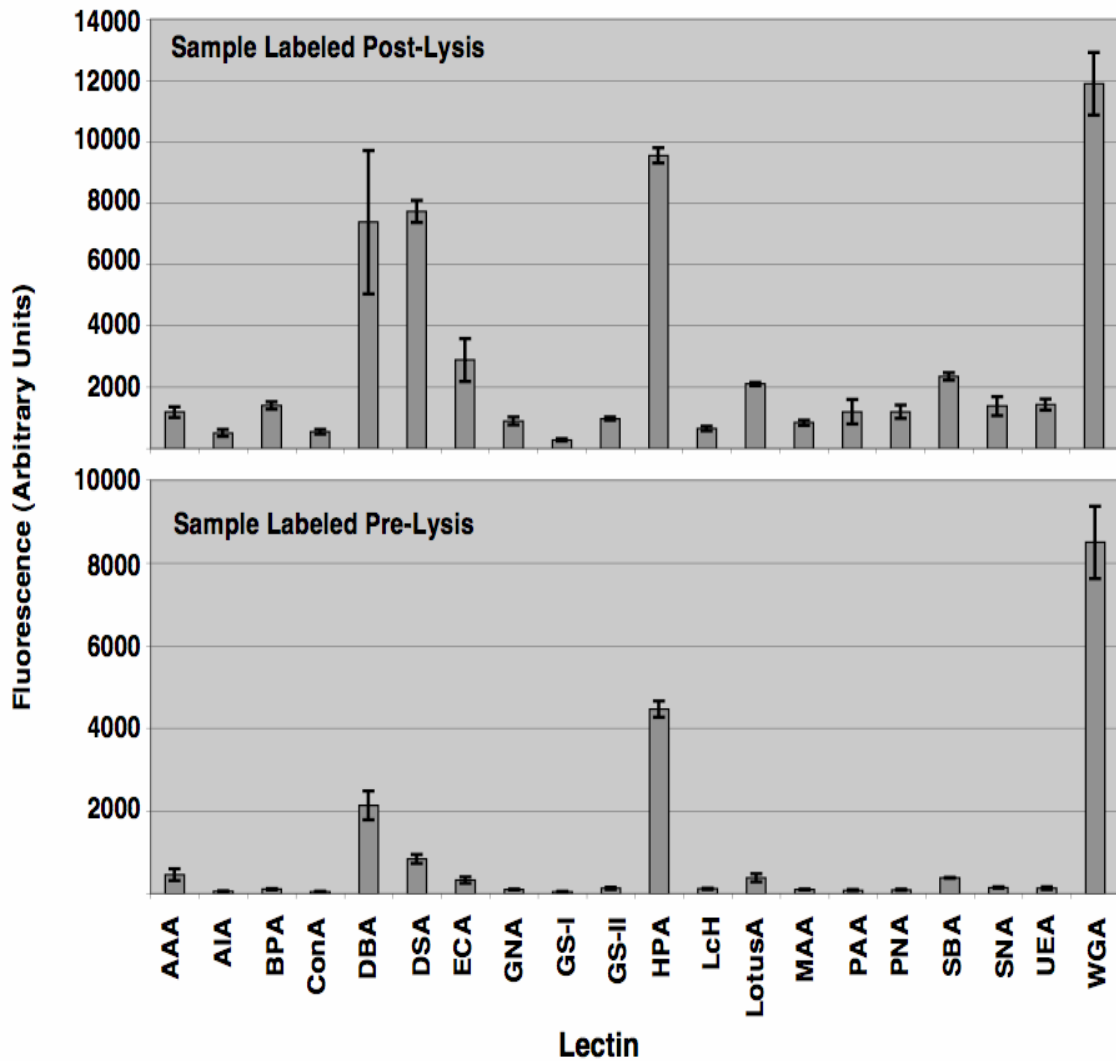

Supplement: pnas_0704954104_1.pdf [file pnas_0704954104_1.pdf]

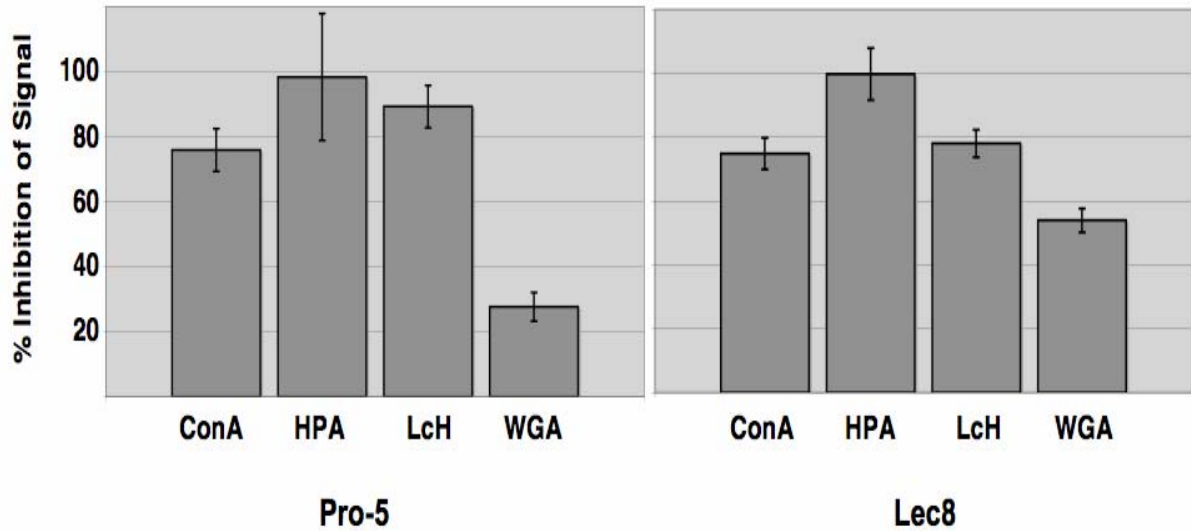

Supplement: pnas_0704954104_2.pdf [file pnas_0704954104_2.pdf]

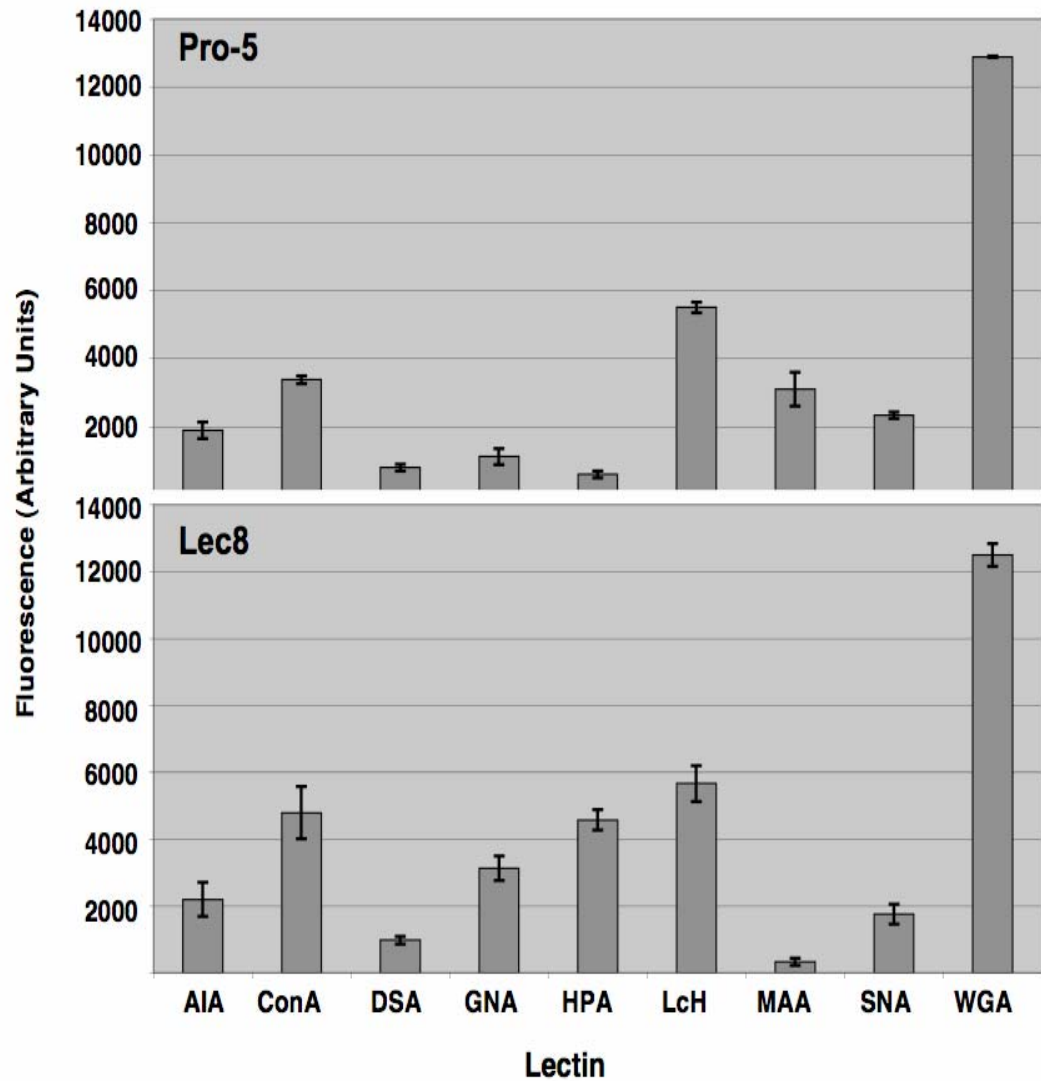

Supplement: pnas_0704954104_3.pdf [file pnas_0704954104_3.pdf]

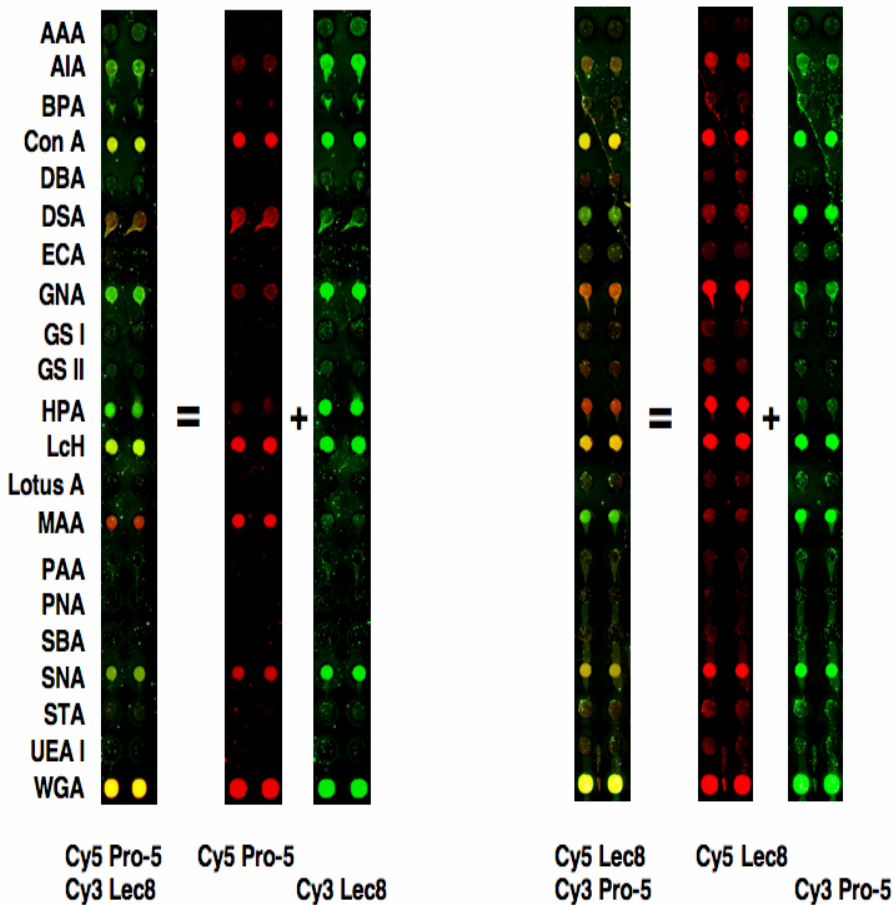

Supplement: pnas_0704954104_4.pdf [file pnas_0704954104_4.pdf]

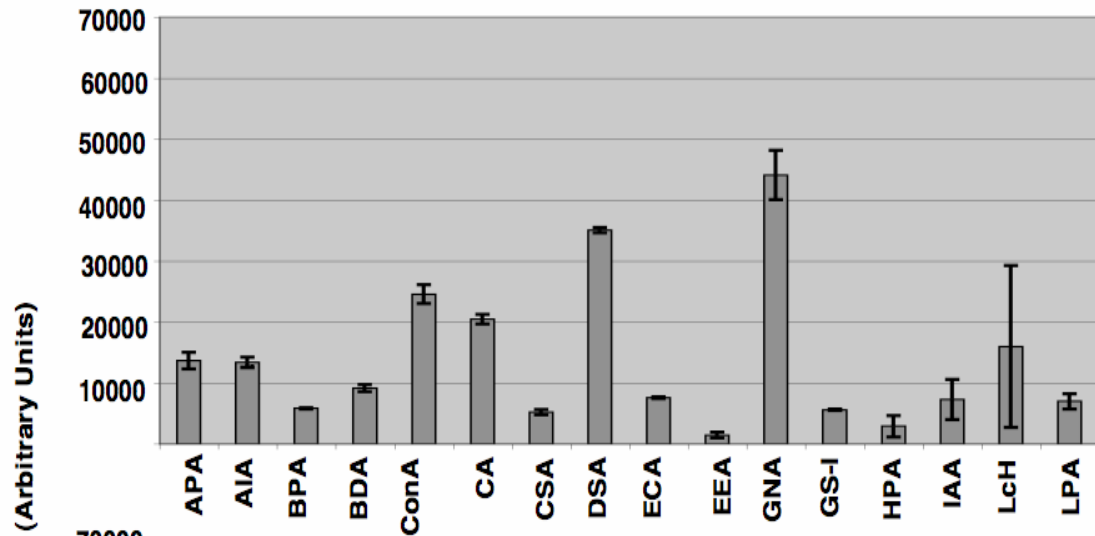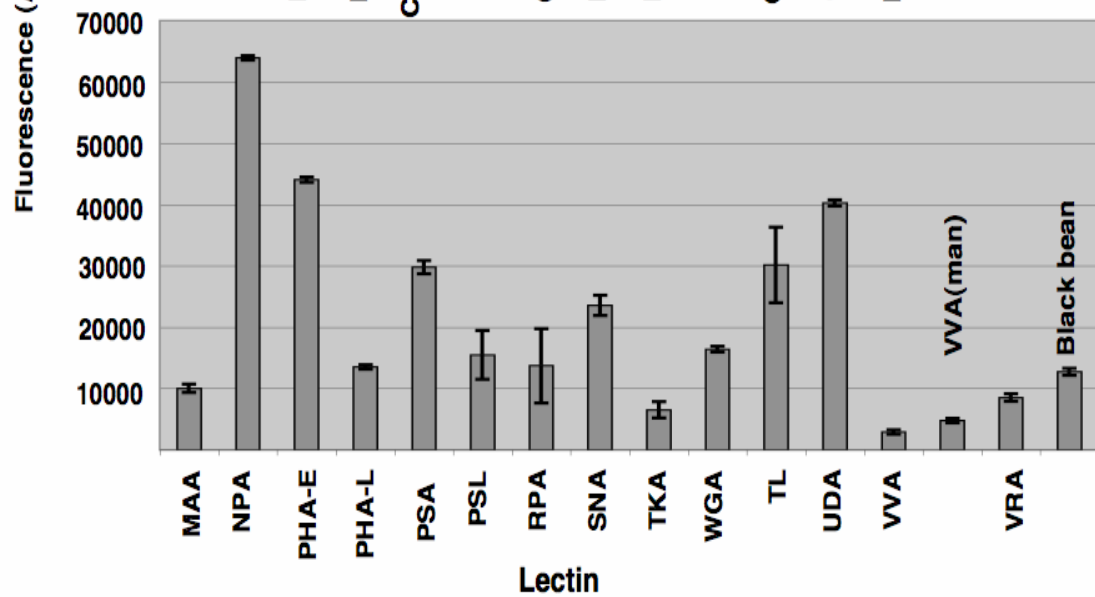

Supplement: pnas_0704954104_5.pdf [file pnas_0704954104_5.pdf]
